# Supplementary material
Source: MDPI journal article supplement (https://www.mdpi.com/1424-8247/16/2/219)
Supplement: s1 [file s1]

**Table S1.** Current status of clinical trials on endostatin combined with chemotherapy in NSCLC.

| Disease type          | Phase         | E/RE<br><i>Dose</i>                                        | Combined<br>Therapy             | Main result                                                                                                                  | Year | Reference         |
|-----------------------|---------------|------------------------------------------------------------|---------------------------------|------------------------------------------------------------------------------------------------------------------------------|------|-------------------|
| Positive results      |               |                                                            |                                 |                                                                                                                              |      |                   |
| NSCLC                 | IV            | RE<br><i>7.5 mg/m<sup>2</sup><br/>d1–14</i>                | NP                              | (+) Improved synergistic effect if concomitant                                                                               | 2012 | [186]             |
| stage IIIA (N2) NSCLC | IV            | RE<br><i>7.5 mg/m<sup>2</sup><br/>d1–14</i>                | NP                              | (+) Combined therapy increased therapeutic efficacy without increasing adverse effects                                       | 2016 | NCT02497118 [187] |
| aNSCLC                | III           | RE<br><i>167.5 mg/m<sup>2</sup><br/>d1–14</i>              | NP                              | (+) Significantly and clinically meaningful improvement in response rate                                                     | 2005 | #[154]            |
| aNSCLC                | III           | RE<br><i>7.5 mg/m<sup>2</sup><br/>d1–14</i>                | NP                              | (+) Combined therapy can result in a significant clinical and survival benefit compared with NP alone                        | 2013 | [148]             |
| aNSCLC                | II            | RE                                                         | NP                              | (+) Significant efficacy and safety if combined                                                                              | 2005 | #[188]            |
| aNSCLC                | single arm II | RE                                                         | TP/NP                           | (+) Combined therapy is effective and safe                                                                                   | 2011 | #[153]            |
| NSCLC                 |               | RE<br><i>15 mg<br/>d1–14</i>                               | CIS/ETO                         | (+) Combined therapy showed promising results: median PFS and OS were 5 and 11.5 months, respectively, and the ORR was 69.7% | 2011 | [151]             |
| aNSCLC                | II            | RE<br><i>7.5 mg/m<sup>2</sup><br/>d1–14 (3-week cycle)</i> | GEM/CIS                         | (+) Combined therapy improves objective response and may improve survival                                                    | 2012 | [189]             |
| pre-treated aNSCLC    | II            | RE<br><i>210 mg, every 4 weeks</i>                         | Nivolumab                       | Favourable efficacy and safety profile                                                                                       |      | [60]              |
| aNSCLC                |               | RE<br>#                                                    | DOC                             | (+) RE may prolong time to progression in patients that benefited from DOC without increased toxicities                      | 2013 | #[190]            |
| aNSCLC                |               | RE<br>#                                                    | CIS/ETO                         | (+) Combined regimen has better short-term effect and tolerance                                                              | 2013 | #[152]            |
| aNSCLC                |               | RE<br><i>7.5 mg/m<sup>2</sup><br/>d1–14 (1 cycle)</i>      | cisplatin                       | (+) RE administered 4 days before CT and combined from day 5 better than combined therapy from day 1                         | 2015 | [191]             |
| m/aNSCLC              |               | RE<br><i>15 mg once every other day for 2 weeks (4x)</i>   | apatinib mesylate vs paclitaxel | (+) Combined therapy showed a better therapeutic effect with improved immune resistance and less side effects                | 2019 | [192]             |
| NSCLC                 |               | RE<br>#                                                    | DOC/CB                          | (+) Combined therapy prolonged disease-free survival and improved three-year OS                                              | 2012 | #[137]            |
| BM of NSCLC           |               | RE<br><i>7.5 mg/m<sup>2</sup><br/>d1–14 every cycle</i>    | NP                              | (+) higher ORR (30% vs. 0%), longer OS (21.44 ± 17.28 vs. 7.71 ± 4.68 months) when combined therapy                          | 2016 | [157]             |
| aNSCLC                | retro         | RE<br><i>15 mg<br/>day 1 or 2</i>                          | CT                              | (+) IV and arterial infusion enhanced the PFS and OS without increasing the risk of toxicity                                 | 2015 | [150]             |
| aNSCLC                | retro         | E<br><i>7.5 mg/m<sup>2</sup><br/>d1–14</i>                 | Emcitabine/CB/GEM               | (+) Combined therapy achieved a better disease control rate compared to CT only                                              | 2018 | [193]             |
| aNSCLC                | Com           | RE<br><i>7.5 mg/m<sup>2</sup><br/>d1–14</i>                | platinum based CT               | (+) Combined therapy was more effective than CT alone if non-driver gene mutated                                             | 2019 | [194]             |
| Negative results      |               |                                                            |                                 |                                                                                                                              |      |                   |
| ED-SCLC               | II            | RE<br><i>7.5 mg/m<sup>2</sup><br/>d1–14 each</i>           | ETO-CB                          | (-) Acceptable toxicity profile, but did not improve OS, PFS, and OR                                                         |      | [195]             |
| aNSCLC                | II            | RE<br><i>7.5 mg/m<sup>2</sup></i>                          | TC                              | (-) Good safety profile but differences in PFS and OS not significant                                                        |      | [158]             |

|                             |             |                                                                                    |                               |                                                                                                                          |             |
|-----------------------------|-------------|------------------------------------------------------------------------------------|-------------------------------|--------------------------------------------------------------------------------------------------------------------------|-------------|
| <i>d8-21 each cycle</i>     |             |                                                                                    |                               |                                                                                                                          |             |
| aNSCLC                      | retro       | RE<br>7.5 mg/m <sup>2</sup><br>d1-14 every 3 weeks                                 | PEM/CIS                       | (-) Combined therapy did not prolong PFS or OS, but a trend of improved PFS was observed in patients administered RE+PEM | [196]       |
| Ongoing                     |             |                                                                                    |                               |                                                                                                                          |             |
| sq-NSCLC                    | II          | RE<br>210 mg<br>d1-3 every 3 weeks                                                 | envafolimab/platinum-based CT | Recruiting                                                                                                               | NCT05243355 |
| driver gene negative aNSCLC | II          | RE<br>210 mg<br>d1 every 3 weeks                                                   | platinum-based CT             | Recruiting                                                                                                               | NCT05574998 |
| aNSCLC                      |             | RE<br>15 mg/m <sup>2</sup><br>d1-5 (every 3 weeks)                                 | PEM/platinum-based CT         | Not yet recruiting                                                                                                       | NCT04094909 |
| phase IB NSCLC              | III         | RE<br>7.5 mg/m <sup>2</sup><br>d1-14                                               | PEM/DOC/CIS                   | Status: unknown                                                                                                          | NCT02001168 |
| driver gene negative aNSCLC | II          | RE<br>210 mg<br>d1 (every 3 weeks)                                                 | PD-1 mAb/platinum-based CT    | Not yet recruiting                                                                                                       | NCT05448781 |
| aNSCLC                      | II          | RE<br>210 mg<br>d1-7 (every 3 weeks)                                               | Envafolimab/S-1               | Not yet recruiting                                                                                                       | NCT05529355 |
| a/metNSCLC                  | I/ PK study | RE*<br>Cycle 1: 7.5 mg/m <sup>2</sup><br>d1-14<br>Cycle 2-4: 105 mg/m <sup>2</sup> | platinum-based CT             | Not yet recruiting                                                                                                       | NCT04942301 |

(aNSCLC) advanced non-small cell lung cancer, (BM) brain metastasis, (CB) carboplatin, (CECs) circulating endothelial cells, (COM) comparative study, (CCRT) concurrent chemoradiotherapy, (CIS) cisplatin, (CIV) continuous intravenous pumping, (CT) chemotherapy, (DOC) docetaxel, (ETO) etoposide, (ED-SCLC) extensive disease small cell lung cancer, (GEM) gemcitabine, (IV) intravenous injection, (KDR) kinase insert domain receptor, (met) metastatic, (M2ES) polyethylene glycol rh recombinant endostatin, (OS) overall survival, (ORR) objective response rate, (PD-1) programmed cell death protein 1, (PEM) pemetrexed, (PFS) progression free survival, (PK) pharmacokinetic, (VEGFR2) vascular endothelial growth factor receptor 2, (NP) vinorelbine and cisplatin, (mNSCLC-aNSCLC) middle or advanced non-small cell lung cancer, (retro) retrospective study, (TC) paclitaxel-carboplatin, (TP) paclitaxel plus cisplatin/carboplatin, (#) Article in Chinese, (\*) intravenous infusion and continuous (pump) infusion.
